# Supplementary figures and images for: Population structure and linkage disequilibrium unravelled in tetraploid potato
Source: PubMed Central journal article supplement — Theor Appl Genet. 2010 Jun 20;121(6):1151–70. doi: 10.1007/s00122-010-1379-5 (PMC2938457; doi:10.1007/s00122-010-1379-5), 2010-06-20

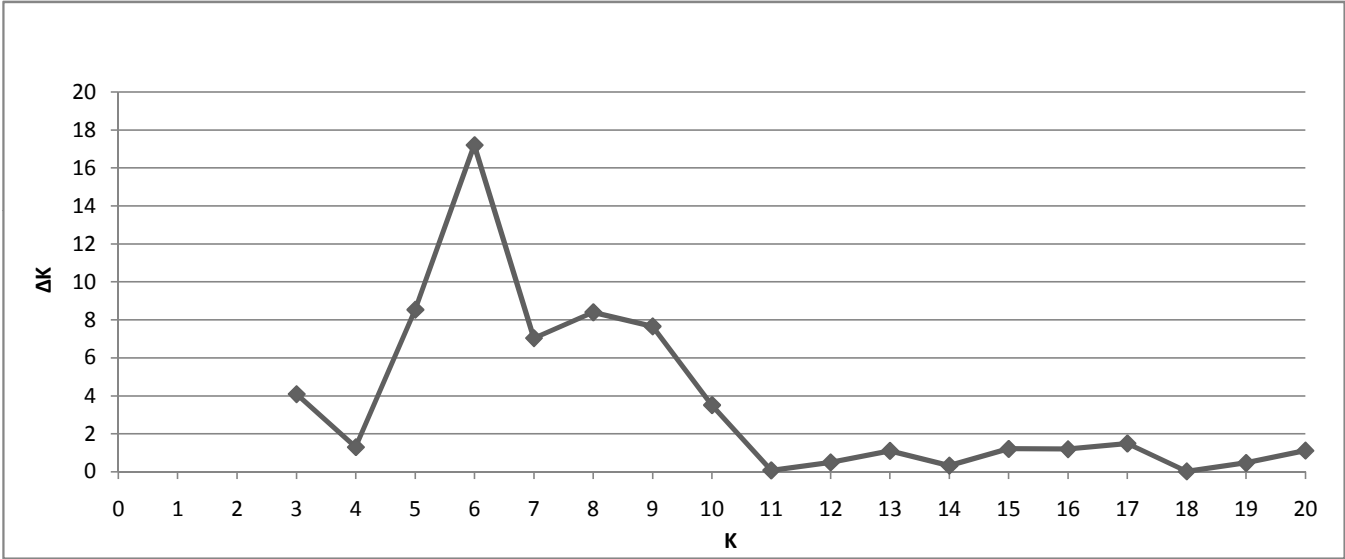

Supplement: 122_2010_1379_MOESM2_ESM.pdf [file 122_2010_1379_MOESM2_ESM.pdf]
